RESEARCH ARTICLE

# Use of healthcare services and expenditure in the US in 2025: The effect of obesity and morbid obesity

Michele Cecchini <sup>1,2\*</sup>

**1** Institute of Global Health Innovation, Imperial College London, London, United Kingdom, **2** Health Division, Organization for Economic Co-operation and Development (OECD), Paris, France

\* [michele.cecchini@oecd.org](mailto:michele.cecchini@oecd.org)

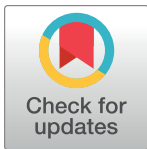

## Abstract

### Objective

This paper explores the contribution of body-mass index (BMI) categories in shaping past trends of use of healthcare services and associated expenditure in the US and projects results to 2025.

### Methods

The study uses Medical Expenditure Panel Survey (MEPS) data for 2000–2012, reweighted on National Health and Nutrition Survey (NHANES) data for 1972–2012 and US Census Bureau data, to carry out projections for up to 2025. A combination of logistic regressions and generalized linear models was used to model use and associated expenditure for the following healthcare services: inpatient care (with/without surgery), office-based care, out-patient-care, drug prescription and home health care. Quantile regressions were used to analyse and project BMI levels.

### Results

20.5 million individuals will be severely obese in 2025. Normal-weight and overweight individuals have stable trends in use for many healthcare services. Conversely, use of healthcare services in patients in class II and class III obesity will increase substantially. Total healthcare expenditure increases more quickly in the obese population than in normal-weight individuals.

### Conclusions

Class III obesity ( $BMI \geq 40 \text{ kg/m}^2$ ) significantly affects demand and expenditure for all healthcare services. Careful healthcare service planning and implementing effective policy actions to counteract such trends is crucial to meet future demand.

## OPEN ACCESS

**Citation:** Cecchini M (2018) Use of healthcare services and expenditure in the US in 2025: The effect of obesity and morbid obesity. PLoS ONE 13 (11): e0206703. <https://doi.org/10.1371/journal.pone.0206703>

**Editor:** Frank J. Chaloupka, University of Illinois at Chicago, UNITED STATES

**Received:** May 29, 2018

**Accepted:** October 8, 2018

**Published:** November 7, 2018

**Copyright:** © 2018 Michele Cecchini. This is an open access article distributed under the terms of the [Creative Commons Attribution License](https://creativecommons.org/licenses/by/4.0/), which permits unrestricted use, distribution, and reproduction in any medium, provided the original author and source are credited.

**Data Availability Statement:** The data used for this study are from third-parties. Data is available on the website of the US Agency for Healthcare Research and Quality at <https://meps.ahrq.gov/>; on the website of the US Centers for Disease Control and Prevention at <https://www.cdc.gov/nchs/nhanes/index.htm> and on the website of the US Census Bureau at <https://www.census.gov/programs-surveys/popproj.html>. Those interested would be able to access the data in the same manner as the author. The author had no special access privileges that other would not have.

**Funding:** The work was carried out without any financial contribution from funders.

**Competing interests:** The author has declared that no competing interests exist.

## Introduction

Despite significant policy efforts to fight unhealthy diets and physical inactivity (e.g. [1,2]), overweight remains a crucial public health challenge for the US. According to the latest estimates, more than 64% of the US adult population has a body mass index (BMI) equal or above 25 kg/m<sup>2</sup> [3–5]. About half of these individuals are obese (i.e. BMI  $\geq$  30 kg/m<sup>2</sup>). Recent analyses suggest that the increase in class I obesity (i.e. BMI between 30 and 35 kg/m<sup>2</sup>) may be occurring at smaller rate than prior to 2005 and that, overall, obesity rates may be stabilizing in both adults and youth [6]. Conversely, class III obesity (i.e. a BMI  $\geq$  40 kg/m<sup>2</sup>) is rising twice as fast as overall obesity (i.e. BMI  $\geq$  30 kg/m<sup>2</sup>) and shows no sign of plateauing [5,7]. Furthermore, different analyses agree that the growth in obesity prevalence is not going to halt for the next ten to fifteen years [5,8,9].

The adverse healthcare consequences of obesity include, among the others, cardiovascular diseases, diabetes and cancers [10,11]. All these diseases require heavy medicalisation and prompt a frequent use of healthcare services. Obese adults and children are more likely to be prescribed drugs [12,13] and to use healthcare services, including diagnostic services [13–17], emergency room visits [13,15,16] and inpatient care [15,17]. Moreover, when using a healthcare service, obese patients require more resource-intensive treatments [18,19].

The associated impact on total healthcare expenditure is substantial. Finkelstein and colleagues [20] conclude that, between 1998 and 2006, obesity-attributable medical spending increased by 45.5% for inpatient care, 26.9% for non-inpatient care and 80.4% for drug expenditure. By using a different approach, Cawley and Meyerhoefer [21] argue that obesity may have a larger impact and, for some healthcare services, costs may be up to 9 times higher than previously calculated. Obese individuals with chronic physical disabilities would incur in almost double costs compared to obese individuals without chronic physical disabilities [17]. Wang [8] calculates that US medical costs associated with common diseases caused by obesity will increase by 48–66 billion USD per year by 2030.

Previous estimates were particularly useful for policy-makers because they justified the implementation of a broad set of preventive interventions to tackle obesity-related risk factors. However, from a healthcare service perspective, available evidence has important limitations. The most significant is that previous studies focus on obesity but do not specifically look at patients with severe obesity. This is particularly important, as patients with moderate and severe obesity have large differences in healthcare costs [19]. Second, available literature does not provide any insight about how healthcare services should adapt to meet future healthcare needs of obese people. This paper builds on the previous research by addressing both of these problems. In particular, this paper explores the contribution of increasing levels of BMI in shaping past and trends of use of a comprehensive set of healthcare services and associated expenditure in the US and project results to 2025.

## Materials and methods

### Methodological overview

Our analyses are primarily based on the Medical Expenditure Panel Survey (MEPS) [22], a dataset reporting information on use of healthcare services and associated expenditure. MEPS data was reweighted to match historical and projected national population statistics to 2015, 2020 and 2025 by using data from the National Health and Nutrition Examination Survey (NHANES) [23] and from the US Census Bureau (USCB) [24]. NHANES was used to calculate BMI prevalence rates and USCB provided information for population distribution by gender, age and ethnicity. The reweighting procedure was carried out on the basis of 384 small

homogeneous population groups defined by gender, age group, ethnicity and BMI. A detailed definition of the categories can be found in the [S1 Appendix](#).

## Data

MEPS is an annual survey collecting data on demography, socio-economic status, healthcare utilization and expenditure for the US civilian non-institutionalized population. We used all the waves from 2000 to 2012 and pooled the data for the following six healthcare services: inpatient care (with and without surgery), office-based care, outpatient-care, drug prescription and home health care. Expenditure and charges are expressed in 2010 USD using event-specific product price indexes retrieved from the Office of the Actuary of the Centers for Medicare and Medicaid Services [25].

USCB provides the number of individuals in each population group by gender, age and ethnicity for each year between 2000 and 2025. Reweighting of MEPS data was also extended to data between 2000 and 2012 because discrepancies between MEPS and USCB in the size of the various population groups would have caused spurious inconsistencies between historical and projected trends. NHANES is a study designed to assess the health and the nutritional status of the US population. Our analysis uses all the available waves of NHANES between 1972 and 2012. Prevalence of BMI categories was reweighted on NHANES (rather than using prevalence rates calculated on MEPS) because NHANES covers a longer period (which allows more robust projections) and because NHANES provides the gold standard for BMI estimates in the US.

## Analyses on MEPS

Use of healthcare services was modelled using a two-part model combining a logistic regression to model the probability of use of any specific healthcare service, combined with a generalized linear model (GLM), conditional on having positive access to the healthcare service, to model the average number of use of healthcare services [26,27]. The expenditure specific to each healthcare service is calculated by multiplying the results of the previous two-step model for the average expenditure per access calculated, again, with a GLM model. The Akaike information criterion [28,29] approach was used to select the best fitting combination of link and distribution families in all the GLMs. All the GLMs (but those on use of inpatient services) were calculated by fitting a gamma (Poisson) distribution and a log link. The set of explanatory variables included: gender, age group, ethnicity, level of education, family income, type of insurance coverage, marital status, region of residence, BMI category and year. This approach was shown to be the most suitable to model use of healthcare services and healthcare expenditure [26]. The projections of the use of healthcare services and their associated expenditure were estimated on the fitted models by setting the value of the variables as follows: gender, age group, ethnicity and BMI category were set at the values calculated on NHANES and USCB; all the other covariates, with the exception of the variable year, were set at their values as in MEPS for the period 2000–2012 and at the value they had in 2012 for the projections; the variable year was set at the relevant year (e.g. 2008, 2015, etc.) to account for any underlying trend (e.g. changes in clinical practice).

## Calculation of the weights

For each year, resampling weights are calculated in two steps. In a first step USCB data was used to calculate the relative prevalence of each population group defined by gender, age-group and ethnicity. AS USCB provides both historical and projected population estimates, no further manipulation was necessary. In a second step, NHANES data was used to further split

these groups by six levels of BMI for adults [4] and three for children [30]. Waves between 2000 and 2012 provided the prevalence of each population group by BMI level for the relevant period. Projected prevalence rates were instead calculated by using a quantile regression (QR) approach on all the waves between 1972 and 2012. QR was selected because it is particularly efficient when individual quantiles in the distribution of an outcome (i.e. BMI) behave differently along a given dimension (i.e. time). Additionally, QR does not impose any constraint on the future distribution of the outcome variable allowing for higher flexibility in projections and for a non-linear extrapolation of prevalence rates. Thus, it can take into account slow-downs or rapidly increasing trends in specific population sub-groups. All the models include as explanatory variables the same set of variables used on MEPS; in addition the models include a squared version of the variable year as well as interaction terms between year and age group and between gender and education level/socio-economic status (additional information can be found in the [S1 Appendix](#)). BMI projections were estimated by setting the time period to the forecasted year (e.g. 2020) while maintaining all the other covariates at the most recent year for which data is available.

## Results

### The US population in 2000 and in 2025: Epidemiologic and socio-demographic developments

Between 2000 and 2025, the US population will go through significant epidemiologic and socio-demographic changes ([Table 1](#)). 12.7% of US population was aged 65 or more in 2000. This percentage will increase by about 50% (+5.8% in absolute terms) and people aged 65 or more will become 18.5% of the US population in 2025. The prevalence of white non-hispanic people is also gradually decreasing while the prevalence rate of Hispanics and Asians is expected to grow by more than 50% between 2000 and 2025. Changes in the prevalence of overweight and obesity are also considerable. Almost 64% of the US population will be either overweight or obese in 2025, compared to about 54% in 2000. Severe obesity (i.e. class III obesity) shows particularly high growth rates, rising from about 3.1% of the population in 2000 to 4.5% in 2012 (i.e. +44%), to 6.1% in 2025 (i.e. +35% compared to 2012).

### Use of healthcare services and expenditure at different levels of obesity

Throughout the studied period, the rate of drug prescriptions for obese people is, on average, 2.4 times higher than for normal-weight people ([Table 2](#)). However, individuals in class III obesity show a rate of drug prescription which is, on average 3.6 times higher than normal-weight individuals. Similar patterns can be identified for all the other types of healthcare services included in the study. For instance, compared to normal-weight people, individuals in class III obesity are respectively 2.1, 2.7 and 4.5 times more likely to be admitted to a hospital, to undergo surgery or to use home healthcare services.

Obese and severe obese individuals use a significantly higher share of healthcare resources. Normal-weight and overweight people show decreasing or substantially stable trends of use of healthcare services (drug prescriptions excluded). The opposite is true for obese people and, in particular, individuals in class III obesity. In this group, for example, use of home healthcare services is expected to increase from 273 (confidence interval, ci: 187–359) episodes per thousand people in 2000 to 295 (ci: 199–391) episodes per thousand people in 2012 (+8%) to 506 (ci: 251–761) episodes per thousand people in 2025 (+72% compared to 2012). Similarly, the average number of drug prescriptions increased from an average of 20.7 (ci: 19.7–21.8)

**Table 1. Key socio-demographic characteristics; prevalence rate in the US population, 2000–2025.**

|                           | historic data |        |        |        | projections |        |        |
|---------------------------|---------------|--------|--------|--------|-------------|--------|--------|
|                           | 2000          | 2004   | 2008   | 2012   | 2015        | 2020   | 2025   |
| Population (million)      | 275.31        | 285.27 | 295.01 | 304.76 | 312.27      | 324.93 | 337.81 |
| Gender                    |               |        |        |        |             |        |        |
| Males                     | 0.489         | 0.489  | 0.489  | 0.489  | 0.489       | 0.489  | 0.488  |
| Females                   | 0.511         | 0.511  | 0.511  | 0.511  | 0.511       | 0.511  | 0.512  |
| Age                       |               |        |        |        |             |        |        |
| 0–44                      | 0.651         | 0.630  | 0.610  | 0.597  | 0.591       | 0.586  | 0.582  |
| 45–64                     | 0.222         | 0.244  | 0.260  | 0.265  | 0.262       | 0.249  | 0.232  |
| 65+                       | 0.127         | 0.126  | 0.130  | 0.138  | 0.147       | 0.165  | 0.185  |
| Ethnicity                 |               |        |        |        |             |        |        |
| White non-Hispanic        | 0.714         | 0.697  | 0.681  | 0.666  | 0.655       | 0.638  | 0.620  |
| Black                     | 0.128         | 0.130  | 0.132  | 0.134  | 0.136       | 0.138  | 0.139  |
| Hispanic                  | 0.108         | 0.118  | 0.128  | 0.137  | 0.144       | 0.155  | 0.166  |
| Others                    | 0.050         | 0.054  | 0.058  | 0.062  | 0.065       | 0.070  | 0.075  |
| BMI category <sup>a</sup> |               |        |        |        |             |        |        |
| Underweight               | 0.016         | 0.014  | 0.013  | 0.010  | 0.009       | 0.008  | 0.010  |
| Normal-weight             | 0.448         | 0.418  | 0.398  | 0.397  | 0.387       | 0.369  | 0.354  |
| Pre-obesity               | 0.302         | 0.304  | 0.301  | 0.303  | 0.304       | 0.309  | 0.325  |
| Class I obesity           | 0.147         | 0.163  | 0.174  | 0.180  | 0.187       | 0.193  | 0.181  |
| Class II obesity          | 0.055         | 0.062  | 0.069  | 0.064  | 0.064       | 0.065  | 0.069  |
| Class III obesity         | 0.031         | 0.039  | 0.045  | 0.045  | 0.049       | 0.056  | 0.061  |
| Insurance coverage        |               |        |        |        |             |        |        |
| public-only               | 0.726         | 0.697  | 0.663  | 0.644  | 0.681       | 0.673  | 0.664  |
| Private                   | 0.157         | 0.180  | 0.203  | 0.229  | 0.192       | 0.200  | 0.209  |
| out-of-pocket             | 0.117         | 0.123  | 0.134  | 0.127  | 0.127       | 0.127  | 0.126  |

<sup>a</sup> BMI (Body Mass Index) categories are defined according to WHO thresholds (WHO, 2016) for adults and Cole et al. 2000 for children and teenagers

<https://doi.org/10.1371/journal.pone.0206703.t001>

prescriptions per severe obese patient in 2000 to 25.2 (ci: 23.9–26.5) in 2012 (+22%) to 35.4 (ci: 32.7–38.0) in 2025 (+40% compared to 2012).

As shown in Table 3, obesity is also associated with higher healthcare service-specific expenditure and total expenditure (calculated as the sum of the expenditure for all the healthcare services used by a patient). For example, healthcare expenditure for drug prescriptions and inpatient care with or without surgery is twice as high in obese patients as it is in normal-weight individuals. Similarly, total healthcare expenditure for individuals in class II and class III obesity is, respectively, 2.2 and 2.5 times higher than in normal-weight individuals.

The expenditure of the majority of healthcare services is expected to grow by about 1.5 to 3.5 times in the period 2000–2025 with about a third of this increase taking place between 2000 and 2012. Healthcare expenditure in obese individuals tends to grow more than in normal-weight individuals. For example, the average expenditure per episode of inpatient care with surgery for a normal-weight patient increases from 735 (ci: 629–841) USD in 2000 to 1,092 (ci: 851–1,333) USD in 2025 (i.e. +49%) while, in the same period, the average expenditure for a class III obese patient increases from 1,977 (ci: 1,654–2,300) USD to 3,618 (ci: 2889–4347) USD (i.e. +83%). Average total healthcare expenditure in 2025 will be more than twice as high as in 2000. In 2025, normal-weight individuals and individuals in class II and class III obesity show an average total healthcare expenditure which is respectively 69%, 76% and 93% higher than in 2012.

**Table 2. Healthcare service use and (standard error) per 1000 persons by year, category of service and BMI; US population 2000–2025.**

| BMI <sup>a</sup>            |           | 2000  |     | 2012  |     | 2015  |     | 2020  |      | 2025  |      |
|-----------------------------|-----------|-------|-----|-------|-----|-------|-----|-------|------|-------|------|
|                             |           | Value | SE  | Value | SE  | Value | SE  | Value | SE   | Value | SE   |
| Prescriptions               | [18.5–25] | 6081  | 156 | 7223  | 202 | 7558  | 258 | 8092  | 331  | 8875  | 434  |
|                             | [25–30]   | 9539  | 217 | 11285 | 263 | 11647 | 332 | 12081 | 415  | 12485 | 516  |
|                             | [30–35]   | 11693 | 261 | 13921 | 309 | 14352 | 388 | 15542 | 505  | 15884 | 636  |
|                             | [35–40]   | 17206 | 416 | 20389 | 497 | 21692 | 620 | 23197 | 786  | 25698 | 1018 |
|                             | [40+]     | 20723 | 541 | 25215 | 650 | 26721 | 795 | 30623 | 1027 | 35382 | 1355 |
| Inpatient care (no surgery) | [18.5–25] | 215   | 6   | 198   | 6   | 191   | 7   | 182   | 8    | 175   | 9    |
|                             | [25–30]   | 242   | 7   | 224   | 6   | 215   | 7   | 205   | 8    | 195   | 9    |
|                             | [30–35]   | 282   | 8   | 261   | 8   | 251   | 9   | 244   | 10   | 235   | 11   |
|                             | [35–40]   | 344   | 11  | 322   | 10  | 316   | 11  | 312   | 13   | 312   | 15   |
|                             | [40+]     | 426   | 1   | 406   | 15  | 397   | 16  | 396   | 18   | 397   | 20   |
| Inpatient care (surgery)    | [18.5–25] | 86    | 4   | 77    | 4   | 74    | 5   | 70    | 5    | 66    | 6    |
|                             | [25–30]   | 111   | 5   | 100   | 5   | 97    | 6   | 90    | 6    | 83    | 7    |
|                             | [30–35]   | 128   | 6   | 115   | 6   | 111   | 6   | 106   | 7    | 100   | 8    |
|                             | [35–40]   | 174   | 9   | 159   | 8   | 160   | 9   | 157   | 11   | 157   | 12   |
|                             | [40+]     | 211   | 11  | 199   | 11  | 199   | 13  | 201   | 15   | 205   | 18   |
| Office-based care           | [18.5–25] | 4219  | 103 | 4308  | 108 | 4329  | 127 | 4348  | 150  | 4403  | 180  |
|                             | [25–30]   | 5181  | 119 | 5278  | 122 | 5235  | 143 | 5144  | 169  | 5058  | 198  |
|                             | [30–35]   | 5793  | 134 | 5881  | 140 | 5847  | 163 | 5917  | 196  | 5788  | 232  |
|                             | [35–40]   | 7172  | 180 | 7308  | 199 | 7430  | 232 | 7423  | 273  | 7672  | 328  |
|                             | [40+]     | 7913  | 235 | 8195  | 249 | 8318  | 281 | 8761  | 331  | 9181  | 393  |
| Outpatient care             | [18.5–25] | 363   | 27  | 266   | 22  | 249   | 26  | 249   | 26   | 196   | 31   |
|                             | [25–30]   | 564   | 36  | 411   | 29  | 382   | 35  | 382   | 35   | 273   | 37   |
|                             | [30–35]   | 600   | 41  | 439   | 31  | 405   | 36  | 405   | 36   | 299   | 39   |
|                             | [35–40]   | 958   | 84  | 714   | 76  | 699   | 89  | 699   | 89   | 550   | 91   |
|                             | [40+]     | 1013  | 81  | 774   | 67  | 751   | 78  | 751   | 78   | 687   | 93   |
| Home healthcare             | [18.5–25] | 79    | 15  | 75    | 14  | 82    | 22  | 82    | 26   | 89    | 33   |
|                             | [25–30]   | 103   | 16  | 97    | 15  | 105   | 23  | 100   | 28   | 95    | 32   |
|                             | [30–35]   | 99    | 16  | 93    | 15  | 102   | 24  | 111   | 30   | 115   | 39   |
|                             | [35–40]   | 167   | 27  | 170   | 28  | 194   | 42  | 221   | 55   | 261   | 74   |
|                             | [40+]     | 273   | 44  | 295   | 49  | 348   | 75  | 408   | 97   | 506   | 130  |

The table reports the number of times that a given healthcare service was used per 1000 persons; prescriptions refers to the number of drug prescriptions; SE is standard error

<sup>a</sup> BMI (Body Mass Index) categories are defined according to WHO thresholds (WHO 2016) for adults and Cole et al. 2000 for children and teenagers.

<https://doi.org/10.1371/journal.pone.0206703.t002>

### The effect of obesity on the use of healthcare services at the population level

Figs 1 and 2 show the expected change in use of healthcare services and healthcare expenditure at the population level by BMI category, taking 2000 as the base year. These two figures are calculated by taking into account changes in use of healthcare services and expenditure at the individual level as presented in Tables 2 and 3 and the number of individuals in each BMI category (Table 1). At the population level, use of all healthcare services, but outpatient care, is expected to increase (Fig 1 and additional results in the S1 Fig). Drug prescriptions and use of home healthcare services are the healthcare services increasing the most. Inpatient care with or without surgery is projected to increase, but at a smaller rate.

**Table 3. Healthcare expenditure and (standard error) per capita by year, category of service and BMI; US population 2000–2025.**

| BMI <sup>a</sup>             |           | 2000  |     | 2012  |     | 2015  |     | 2020  |     | 2025  |     |
|------------------------------|-----------|-------|-----|-------|-----|-------|-----|-------|-----|-------|-----|
|                              |           | Value | SE  | Value | SE  | Value | SE  | Value | SE  | Value | SE  |
| Prescriptions                | [18.5–25] | 383   | 22  | 641   | 59  | 758   | 88  | 993   | 147 | 1334  | 237 |
|                              | [25–30]   | 601   | 34  | 999   | 58  | 1166  | 92  | 1480  | 159 | 1877  | 250 |
|                              | [30–35]   | 717   | 45  | 1206  | 65  | 1406  | 103 | 1862  | 184 | 2304  | 288 |
|                              | [35–40]   | 1004  | 53  | 1677  | 96  | 2016  | 151 | 2629  | 269 | 3529  | 446 |
|                              | [40+]     | 1202  | 65  | 2054  | 121 | 2463  | 187 | 3451  | 342 | 4855  | 585 |
| Inpatient care (no surgery)  | [18.5–25] | 834   | 61  | 939   | 71  | 1026  | 88  | 1183  | 115 | 1395  | 152 |
|                              | [25–30]   | 1145  | 75  | 1294  | 85  | 1410  | 106 | 1604  | 135 | 1820  | 170 |
|                              | [30–35]   | 1278  | 90  | 1458  | 97  | 1594  | 119 | 1883  | 154 | 2123  | 196 |
|                              | [35–40]   | 1819  | 136 | 2085  | 151 | 2352  | 186 | 2794  | 241 | 3367  | 317 |
|                              | [40+]     | 2273  | 181 | 2680  | 218 | 3024  | 268 | 3734  | 349 | 4670  | 468 |
| Inpatient care (surgery)     | [18.5–25] | 735   | 54  | 801   | 61  | 866   | 77  | 961   | 96  | 1092  | 123 |
|                              | [25–30]   | 1033  | 67  | 1130  | 76  | 1218  | 96  | 1330  | 117 | 1444  | 142 |
|                              | [30–35]   | 1142  | 78  | 1255  | 87  | 1354  | 107 | 1537  | 134 | 1663  | 163 |
|                              | [35–40]   | 1627  | 122 | 1804  | 135 | 2020  | 167 | 2316  | 207 | 2681  | 260 |
|                              | [40+]     | 1977  | 165 | 2260  | 192 | 2523  | 234 | 3001  | 291 | 3618  | 372 |
| Office-based care            | [18.5–25] | 520   | 19  | 886   | 35  | 1047  | 47  | 1385  | 70  | 1848  | 106 |
|                              | [25–30]   | 674   | 24  | 1145  | 40  | 1341  | 53  | 1747  | 79  | 2282  | 115 |
|                              | [30–35]   | 758   | 28  | 1285  | 51  | 1514  | 66  | 2034  | 98  | 2611  | 140 |
|                              | [35–40]   | 957   | 37  | 1620  | 67  | 1944  | 88  | 2548  | 128 | 3457  | 189 |
|                              | [40+]     | 1028  | 54  | 1773  | 95  | 2123  | 119 | 2945  | 170 | 4039  | 246 |
| Outpatient care              | [18.5–25] | 338   | 31  | 328   | 32  | 334   | 38  | 334   | 38  | 373   | 56  |
|                              | [25–30]   | 529   | 41  | 514   | 44  | 520   | 52  | 520   | 52  | 556   | 73  |
|                              | [30–35]   | 569   | 47  | 561   | 48  | 569   | 56  | 569   | 56  | 604   | 77  |
|                              | [35–40]   | 922   | 94  | 899   | 107 | 927   | 121 | 927   | 121 | 1005  | 154 |
|                              | [40+]     | 942   | 94  | 923   | 99  | 950   | 111 | 950   | 111 | 1142  | 157 |
| Home healthcare              | [18.5–25] | 79    | 20  | 100   | 25  | 124   | 43  | 151   | 60  | 200   | 86  |
|                              | [25–30]   | 101   | 21  | 127   | 26  | 155   | 45  | 181   | 61  | 209   | 80  |
|                              | [30–35]   | 105   | 23  | 132   | 28  | 165   | 49  | 219   | 73  | 278   | 104 |
|                              | [35–40]   | 149   | 32  | 207   | 44  | 267   | 73  | 374   | 111 | 537   | 172 |
|                              | [40+]     | 244   | 52  | 354   | 77  | 474   | 132 | 681   | 194 | 1039  | 301 |
| Total healthcare expenditure | [18.5–25] | 2890  | 16  | 3695  | 20  | 4156  | 27  | 5024  | 39  | 6243  | 57  |
|                              | [25–30]   | 4083  | 20  | 5210  | 24  | 5810  | 32  | 6879  | 44  | 8188  | 62  |
|                              | [30–35]   | 4568  | 23  | 5896  | 27  | 6603  | 36  | 8139  | 51  | 9583  | 72  |
|                              | [35–40]   | 6479  | 36  | 8292  | 43  | 9527  | 56  | 11613 | 78  | 14576 | 113 |
|                              | [40+]     | 7666  | 47  | 10043 | 59  | 11557 | 76  | 14858 | 106 | 19363 | 156 |

The table reports the average healthcare expenditure per capita; prescriptions refers to the average expenditure for drug prescriptions; SE is standard error

<sup>a</sup> BMI (Body Mass Index) categories are defined according to WHO thresholds (WHO 2016) for adults and Cole et al. 2000 for children and teenagers.

<https://doi.org/10.1371/journal.pone.0206703.t003>

After scaling-up results presented in Table 2 to the population level (i.e. by taking into account the number of individuals in different BMI categories and its evolution over time), normal-weight and overweight individuals show decreasing or stable trends in use of many healthcare services (e.g. outpatient care and inpatient care with or without surgery). Trends in use of healthcare services for individuals in class I obesity showed a sustained increase between 2000 and 2012. Such increase is projected to continue, but at a smaller rate, between 2012 and 2020 and to stabilize (i.e. drug prescriptions and home healthcare services) or even

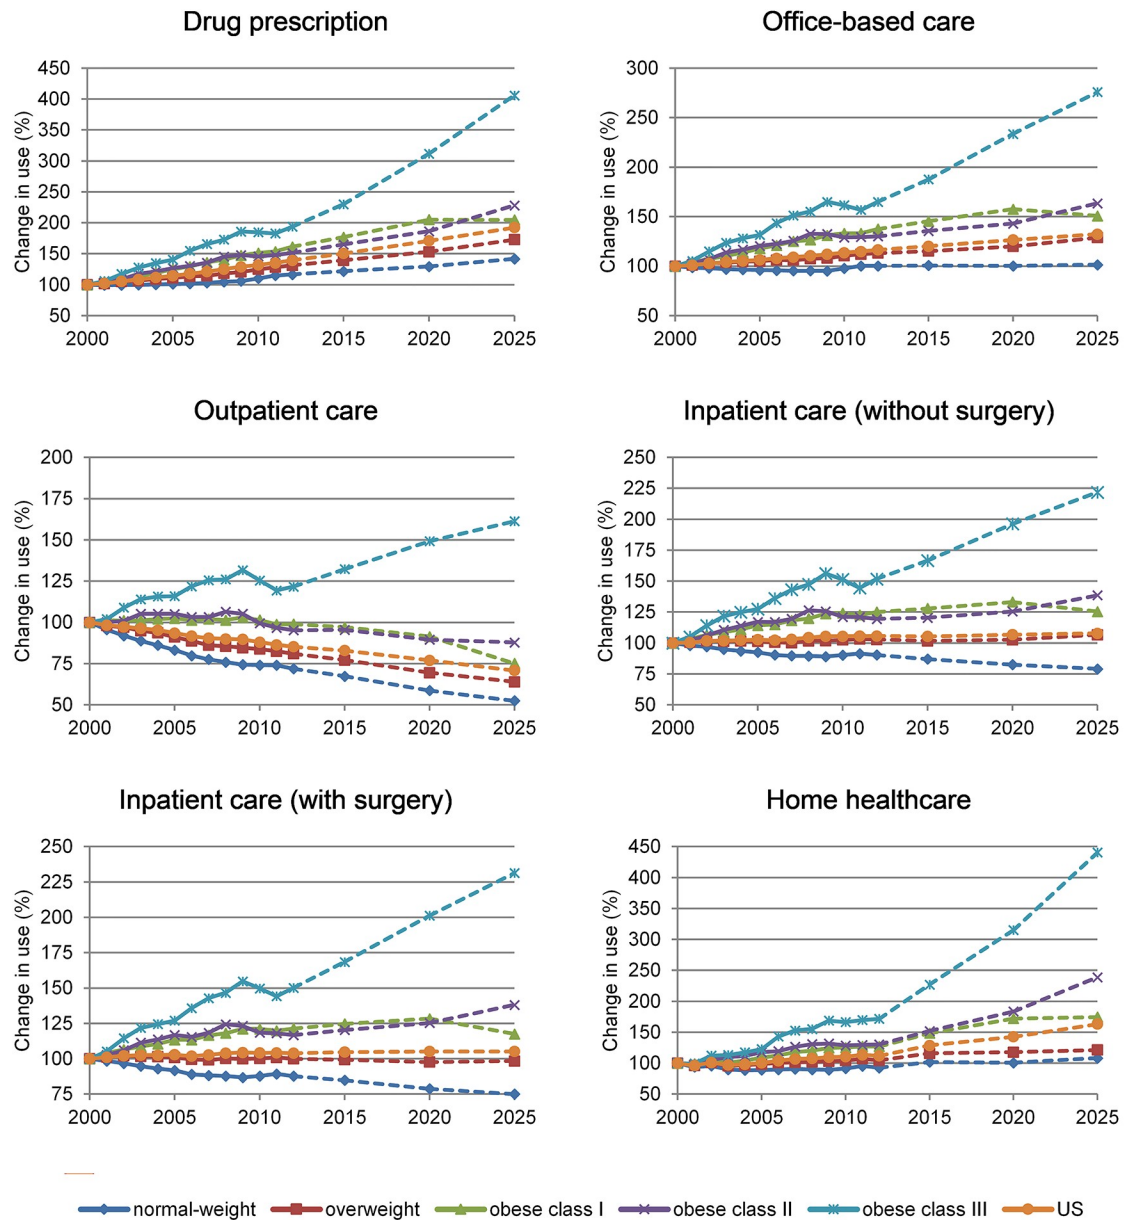

**Fig 1. Change in use of healthcare services (%) by category of service and BMI; US population 2000–2025.** Note: continuous lines represent historical trends; dotted lines represent projections; BMI (Body Mass Index) categories are defined according to WHO thresholds (WHO 2016) for adults and Cole et al. 2000 for children and teenagers; 2000 is base year equal to 100; additional results in the [S1 Fig](#).

<https://doi.org/10.1371/journal.pone.0206703.g001>

reverse (i.e. all the other healthcare services) after 2020. Conversely, use of healthcare services for individuals in class II and class III obesity increases consistently. This pattern is particularly clear in the case of outpatient care services. In fact, total number of outpatient visits is expected to decrease for all the BMI categories with the exception of individuals in class III obesity whose total number is expected to increase by 60% between 2000 and 2025.

At the population level, real-term total healthcare expenditure (i.e. after adjusting for inflation) increased by about 50% between 2000 and 2012 and is expected to increase by a further 91% between 2012 and 2025. Total healthcare expenditure is expected to increase more quickly



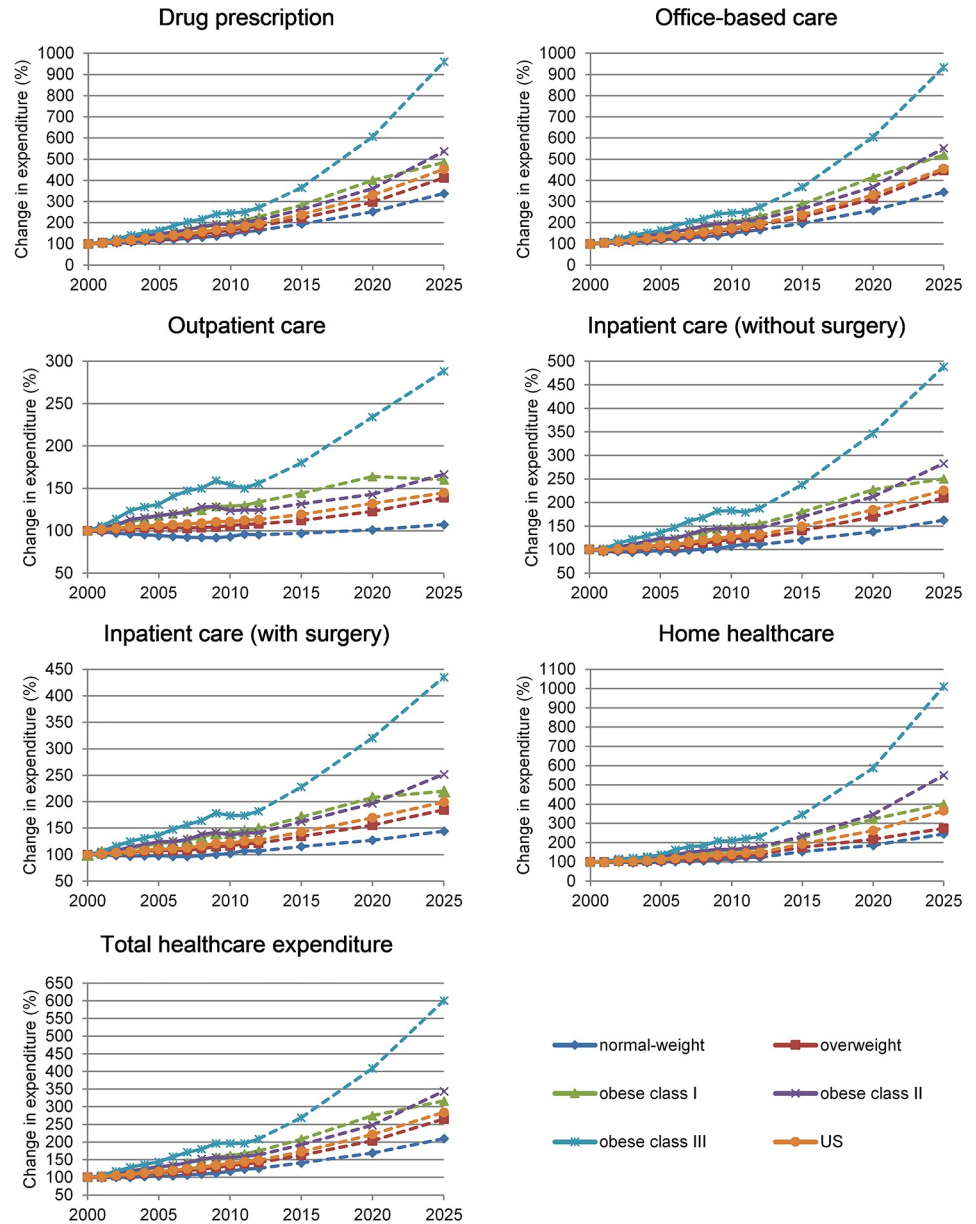

**Fig 2. Change in healthcare expenditure (%) by category of service and BMI; US population 2000–2025.** Note: continuous lines represent historical trends; dotted lines represent projections; BMI (Body Mass Index) categories are defined according to WHO thresholds (WHO 2016) for adults and Cole et al. 2000 for children and teenagers; 2000 is base year equal to 100; additional results in the [S2 Fig](#).

<https://doi.org/10.1371/journal.pone.0206703.g002>

in the obese population. For example, total expenditure for individuals in class III obesity increased by about 110% between 2000 and 2012 and is projected to increase by about 190% between 2012 and 2025.

Healthcare service-specific expenditure is also expected to increase. Drug prescription and office based care show the greatest growth (i.e. about 4 times between 2000 and 2025), while outpatient care and inpatient care with surgery show the smallest increase (i.e. 1.5–2 times). Expenditure in class I to class III obese patients consistently grows more quickly than in

normal-weight and overweight individuals. Real-term expenditure for outpatient care in normal-weight individuals is projected to remain virtually stable throughout the studied period.

## Discussion

Obesity has been an important factor in determining recent trends of use of healthcare services and associated expenditure. Our analyses suggest that obesity will also play a significant role in the next decade. Only 1 in 3 people living in the US will not be overweight or obese by 2025 while the number of individuals in class III obesity is expected to grow to 20.5 million people in 2025.

Per capita use of many healthcare services, including inpatient care with and without surgery and outpatient care, is generally decreasing over time for all the individuals independently from their level of BMI. Simultaneously, the number of drug prescriptions and use of home healthcare services has steadily increased suggesting that these healthcare services may have allowed a sharp reduction in the number of hospitalizations. Conversely, the average expenditure per episode has been increasing.

By scaling up these trends at the population levels, our analyses suggest that the US should expect a significant increase in the total number of episodes of care and its associated expenditure. Two crucial drivers of such increase are the growth in the obese population, severely obese individuals in particular, and a higher average expenditure per episode of care. Conversely, decreasing trends in average use of some healthcare services and a levelling-off of the expenditure for overweight individuals, whose expenditure is converging towards the levels of normal-weight individuals help prevent a more significant increase in total healthcare expenditure.

## Policy implications

From a policy perspective a crucial issue is how decision makers can respond to these trends. A sustained emphasis on policies to encourage healthier lifestyles may contribute to further curb obesity rates. Actions to prevent obesity were shown to save up to 8.3 USD in healthcare expenditure for each US resident [26]. About two thirds of these savings would derive from decreased expenditure for inpatient care, followed by a 30% decrease in expenditure for drug prescriptions. However, while prevention has the potential to play a significant role in curbing rising healthcare expenditure, it is unlikely that prevention can reverse such trends on its own. Our analyses suggest that inpatient services are increasingly substituted by pharmaceutical prescriptions and, possibly, by a wider use of other healthcare services. The expenditure for these healthcare services is lower compared to the expenditure for inpatient care. Moreover, there is evidence that substituting inpatient care with drug prescriptions [31] and ambulatory care [32] may reduce total healthcare expenditure without affecting the health of the population. Policy makers, therefore, should be encouraged to put in place new actions aimed at supporting and reinforcing substitution of resource-intensive healthcare services with more efficient alternatives.

Another crucial challenge is adapting healthcare services to meet a changing population with new healthcare needs. Use of healthcare by class II and class III obese people is projected to grow significantly and, inevitably, healthcare facilities will have to adapt to treat a higher number of severely obese patients. This will require investments on designing suitable facilities and space, on proper equipment and on training and implementing new clinical protocols [33]. Some of these changes, particularly those concerning structural renovation and removal of architectural barriers, require substantial time and planning before their implementation.

It is therefore crucial that healthcare services start working on required arrangements in the short term.

### Comparison of the results from this study with previous attempts

Our results compare favourably to previous research in the field. Two previous studies [8,34] projected that about 45–50% of the US adult population would be obese in 2030. Finkelstein and colleagues [9] instead predict that, respectively, 42% and 11% of the US would be obese and severely obese in 2030. Our analyses conclude that about 36% of the population aged 15 and over will be obese and 7.6% will be severely obese by 2025. Two main reasons help explain why we report slightly lower obesity rates. First, our projections use a shorter timeframe, i.e. 2025 as opposed to 2030. Second, our projections are based on more recent data and reflect a recent plateauing of obesity which emerged after the publication of previous studies.

Some previous studies have also analysed historical trends in use of healthcare services and expenditure by level of BMI. In line with the literature (e.g. [15,19]) our analyses conclude that patients in different classes of obesity have a use of healthcare services which is between 2 and 3.5 times higher than in normal-weight patients. Few studies have also attempted to project obesity-related healthcare costs. For example, Wang et al. [34] conclude that expenditure attributable to obesity is expected to roughly double every decade between 2000 and 2030. Despite differences in the scope of the two studies, results of our analysis seem to suggest that we should expect a lower increase in obesity-attributable expenditure, mainly due to lower obesity rates than forecasted by the previous study.

### Study limitations and strengths

A number of limitations should be noted. The most important is that MEPS data report lower estimations of healthcare expenditure compared to estimates based on the National Health Expenditure Accounts (NHEA) [35]. The main reason is that NHEA includes spending for people residing in institutions while MEPS does not. NHEA also includes expenses for services that are not included in MEPS as, for example, over the counter medications. Finally, MEPS is largely based on self-reported information and recall errors or imperfect understanding of questions may not correctly reflect reality. MEPS addresses this issue by supplementing individual-reported information with administrative data. However, it cannot be completely excluded that, in some cases (e.g. individuals denying the permission to contact providers), the procedure is not fully successful. Because of all these limitations, presented estimates are likely to be conservative and increase in healthcare expenditure may be higher.

A second factor may affect our analyses by making our results more conservative. Our analysis aims to understand the specific contribution of obesity in shaping future healthcare needs. To better appreciate the effect of BMI, we decided to maintain constant all the other socio-economic characteristics of the US population. Hence, our projections assume that historical trends will continue into the future with no disruptive modification in how healthcare services are delivered.

A third factor could influence our findings. Obese individuals have a lower life expectancy than normal-weight individuals [36] and, in principle, this could affect our population-level projections. However, USCB projections take into account past trends and current levels of health-related conditions including those caused by obesity [37]. Therefore, our projections should be sufficiently robust to capture any potential future reduction in population size due to higher levels of BMI.

This study enriches the literature in a number of aspects. First, this study explores future trends of use of a wide-ranging set of healthcare services including: inpatient care with surgery,

inpatient care without surgery, office-based care, outpatient-care, drug prescription and home healthcare. Second, this study does not exclusively focus on total expenditure but investigates the contribution of each healthcare service and its associated expenditure. Third, this paper pinpoints the effect of the different classes of BMI to allow a comparison with other key drivers influencing future levels of healthcare expenditure. Therefore, compared to previous studies, this paper provides policy-makers unique evidence about expected changes in the demand for specific healthcare services. Finally, from a methodological point of view, results of this paper demonstrate that future analyses projecting healthcare expenditure should account for the effects of key epidemiological trends as increasing levels of obesity. Otherwise, results may significantly underestimate the real change in healthcare expenditure.

## Conclusions

This study shows that, between 2000 and 2025, the US population will go through significant epidemiological and socio-demographic changes. Increasing levels of obesity will be a key driver underlying future rises in use of healthcare services and associated expenditure. In particular, obesity will counteract other factors (e.g. changes in delivery of healthcare due to technological innovation and medical advances) that, otherwise, would produce a decrease in the use of inpatient care and other healthcare services. For example, healthcare expenditure for patients with class III obesity will grow from 6% of total healthcare expenditure in 2000 to about 14% in 2025. If no intervention to curb such trends is put in place, total healthcare expenditure per capita in 2025 could be almost three times what it was in 2000.

## Supporting information

### S1 Appendix. Additional methodological information.

(PDF)

### S1 Fig. Share of use of healthcare services (%) by category of service and BMI; US population 2000–2025.

(PDF)

### S2 Fig. Share of healthcare expenditure (%) by category of service and BMI; US population 2000–2025.

(PDF)

## Acknowledgments

The opinions expressed and arguments employed herein are solely those of the author and do not necessarily reflect the official views of the OECD or of its member countries.

## Author Contributions

**Conceptualization:** Michele Cecchini.

**Data curation:** Michele Cecchini.

**Formal analysis:** Michele Cecchini.

**Investigation:** Michele Cecchini.

**Methodology:** Michele Cecchini.

**Resources:** Michele Cecchini.

**Validation:** Michele Cecchini.

**Writing – original draft:** Michele Cecchini.

**Writing – review & editing:** Michele Cecchini.

## References

1. Malik VS, Willett WC, Hu FB. The Revised Nutrition Facts Label: A Step Forward and More Room for Improvement. *JAMA*. 2016; 316: 583–4. <https://doi.org/10.1001/jama.2016.8005> PMID: 27272093
2. Bumpus K, Tagtow A, Haven J. Let's Move! Celebrates 5 Years. *J Acad Nutr Diet*. 2015; 115: 338–41. <https://doi.org/10.1016/j.jand.2014.12.022> PMID: 25721386
3. CDC—Centers for Disease Control and Prevention. Nutrition, Physical Activity, and Obesity: Data, Trends and Maps | DNPAO | CDC [Internet]. [cited 15 Apr 2018]. <https://www.cdc.gov/nccdphp/dnpao/data-trends-maps/index.html>
4. WHO. BMI classification [Internet]. [cited 21 Apr 2018]. [http://apps.who.int/bmi/index.jsp?introPage=intro\\_3.html](http://apps.who.int/bmi/index.jsp?introPage=intro_3.html)
5. Ruhm C. Current and Future Prevalence of Obesity and Severe Obesity in the United States [Internet]. Cambridge, MA; 2007 Jun. 10.3386/w13181
6. Ogden CL, Carroll MD, Fryar CD, Flegal KM. Prevalence of Obesity Among Adults and Youth: United States, 2011–2014. *NCHS Data Brief*. 2015; 1–8. <http://www.ncbi.nlm.nih.gov/pubmed/26633046>
7. Sturm R, Hattori A. Morbid obesity rates continue to rise rapidly in the United States. *Int J Obes (Lond)*. 2013; 37: 889–91. <https://doi.org/10.1038/ijo.2012.159> PMID: 22986681
8. Wang YC, McPherson K, Marsh T, Gortmaker SL, Brown M. Health and economic burden of the projected obesity trends in the USA and the UK. *Lancet*. 2011; 378: 815–825. [https://doi.org/10.1016/S0140-6736\(11\)60814-3](https://doi.org/10.1016/S0140-6736(11)60814-3) PMID: 21872750
9. Finkelstein EA, Khavjou OA, Thompson H, Trogon JG, Pan L, Sherry B, et al. Obesity and Severe Obesity Forecasts Through 2030. *Am J Prev Med*. 2012; 42: 563–570. <https://doi.org/10.1016/j.amepre.2011.10.026> PMID: 22608371
10. Guh DP, Zhang W, Bansback N, Amarsi Z, Birmingham CL, Anis AH. The incidence of co-morbidities related to obesity and overweight: A systematic review and meta-analysis. *BMC Public Health*. 2009; 9: 88. <https://doi.org/10.1186/1471-2458-9-88> PMID: 19320986
11. James PT, Jackson-Leach R, Mhurchu CN, Kalamara E, Shayeghi M, Rigby NJ, et al. Overweight and obesity (high body mass index). In: Ezzati M, Lopez AD, Rodgers A M C, editor. *Comparative Quantification of Health Risks*. Geneva: World Health Organization; 2004. <http://www.who.int/publications/cra/chapters/volume1/0497-0596.pdf>
12. Bell JF, Zimmerman FJ, Arterburn DE, Maciejewski ML. Health-Care Expenditures of Overweight and Obese Males and Females in the Medical Expenditures Panel Survey by Age Cohort. *Obesity*. 2011; 19: 228–232. <https://doi.org/10.1038/oby.2010.104> PMID: 20467420
13. Trasande L, Chatterjee S. The Impact of Obesity on Health Service Utilization and Costs in Childhood. *Obesity*. 2009; 17: 1749–1754. <https://doi.org/10.1038/oby.2009.67> PMID: 19300433
14. Bertakis KD, Azari R. Obesity and the Use of Health Care Services. *Obes Res*. 2005; 13: 372–379. <https://doi.org/10.1038/oby.2005.49> PMID: 15800296
15. Elrashidi MY, Jacobson DJ, St Sauver J, Fan C, Lynch BA, Rutten LJF, et al. Body Mass Index Trajectories and Healthcare Utilization in Young and Middle-aged Adults. *Medicine (Baltimore)*. 2016; 95: e2467. <https://doi.org/10.1097/MD.0000000000002467> PMID: 26765446
16. Goetzel RZ, Gibson TB, Short ME, Chu B-C, Waddell J, Bowen J, et al. A multi-worksite analysis of the relationships among body mass index, medical utilization, and worker productivity. *J Occup Environ Med*. 2010; 52 Suppl 1: S52–8. <https://doi.org/10.1097/JOM.0b013e3181c95b84> PMID: 20061888
17. Peterson MD, Mahmoudi E. Healthcare utilization associated with obesity and physical disabilities. *Am J Prev Med*. 2015; 48: 426–35. <https://doi.org/10.1016/j.amepre.2014.11.007> PMID: 25716534
18. Arterburn DE, Maciejewski ML, Tsevat J. Impact of morbid obesity on medical expenditures in adults. *Int J Obes*. 2005; 29: 334–339. <https://doi.org/10.1038/sj.ijo.0802896> PMID: 15685247
19. Andreyeva T, Sturm R, Ringel JS. Moderate and severe obesity have large differences in health care costs. *Obes Res*. 2004; 12: 1936–43. <https://doi.org/10.1038/oby.2004.243> PMID: 15687394
20. Finkelstein EA, Trogon JG, Cohen JW, Dietz W. Annual medical spending attributable to obesity: payer-and service-specific estimates. *Health Aff (Millwood)*. 2009; 28: w822–31. <https://doi.org/10.1377/hlthaff.28.5.w822> PMID: 19635784

21. Cawley J, Meyerhoefer C. The medical care costs of obesity: an instrumental variables approach. *J Health Econ.* 2012; 31: 219–30. <https://doi.org/10.1016/j.jhealeco.2011.10.003> PMID: 22094013
22. AHRQ—Agency for Healthcare Research and Quality. Medical Expenditure Panel Survey Background [Internet]. [cited 15 Apr 2018]. [https://www.meps.ahrq.gov/mepsweb/about\\_meps/survey\\_back.jsp](https://www.meps.ahrq.gov/mepsweb/about_meps/survey_back.jsp)
23. CDC—Centers for Disease Control and Prevention. NHANES—National Health and Nutrition Examination Survey Homepage [Internet]. [cited 15 Apr 2018]. <https://www.cdc.gov/nchs/nhanes/index.htm>
24. USCB—US Census Bureau. Population Projections [Internet]. [cited 15 Apr 2018]. <https://www.census.gov/programs-surveys/popproj.html>
25. CMS—Office of the Actuary of the Centers for Medicare and Medicaid Services. National Health Expenditures Accounts: Methodology Paper, 2011. Natl Heal Expend Accounts Methodol Pap. 2011; <https://www.cms.gov/Research-Statistics-Data-and-Systems/Statistics-Trends-and-Reports/NationalHealthExpendData/Downloads/dsm-11.pdf>
26. Cecchini M, Sassi F. Preventing Obesity in the USA: Impact on Health Service Utilization and Costs. *Pharmacoeconomics.* Springer International Publishing; 2015; 33: 765–776.
27. Martin BI, Turner JA, Mirza SK, Lee MJ, Comstock BA, Deyo RA. Trends in health care expenditures, utilization, and health status among US adults with spine problems, 1997–2006. *Spine (Phila Pa 1976).* 2009; 34: 2077–84. <https://doi.org/10.1097/BRS.0b013e3181b1fad1> PMID: 19675510
28. Akaike H. A New Look at the Statistical Model Identification. *IEEE Trans Automat Contr.* 1974; 19: 716–723. <https://doi.org/10.1109/TAC.1974.1100705>
29. Burnham KP, Anderson DR. *Multimodel Inference.* Sociol Methods Res. Sage PublicationsSage CA: Thousand Oaks, CA; 2004; 33: 261–304. <https://doi.org/10.1177/0049124104268644>
30. Cole TJ, Bellizzi MC, Flegal KM, Dietz WH. Establishing a standard definition for child overweight and obesity worldwide: international survey. *BMJ.* 2000; 320: 1240–3. <http://www.ncbi.nlm.nih.gov/pubmed/10797032> PMID: 10797032
31. Crémieux P-Y, Ouellette P, Petit P. Do drugs reduce utilisation of other healthcare resources? *Pharmacoeconomics.* 2007; 25: 209–21. <http://www.ncbi.nlm.nih.gov/pubmed/17335307> PMID: 17335307
32. Decker SL, Schappert SM, Sisk JE. Use Of Medical Care For Chronic Conditions. *Health Aff.* 2009; 28: 26–35. <https://doi.org/10.1377/hlthaff.28.1.26> PMID: 19124849
33. Wignall D. Design as a critical tool in bariatric patient care. *J Diabetes Sci Technol.* 2008; 2: 263–7. <https://doi.org/10.1177/193229680800200216> PMID: 19885353
34. Wang Y, Beydoun MA, Liang L, Caballero B, Kumanyika SK. Will All Americans Become Overweight or Obese? Estimating the Progression and Cost of the US Obesity Epidemic. *Obesity.* 2008; 16: 2323–2330. <https://doi.org/10.1038/oby.2008.351> PMID: 18719634
35. CMS—Office of the Actuary of the Centers for Medicare and Medicaid Services. National Health Expenditure Data [Internet]. 2015 [cited 21 Apr 2018]. <http://www.cms.hhs.gov/nationalhealthexpenddata>
36. Chang S-H, Pollack LM, Colditz GA. Life Years Lost Associated with Obesity-Related Diseases for U.S. Non-Smoking Adults. Cook AR, editor. *PLoS One.* 2013; 8: e66550. <https://doi.org/10.1371/journal.pone.0066550> PMID: 23823705
37. Ortman JM, Velkoff VA, Hogan H. An Aging Nation: The Older Population in the United States Current Population Reports [Internet]. 2014. <https://www.census.gov/prod/2014pubs/p25-1140.pdf>
